## 13 Abstract

14 Background: Structural changes caused by spinal curvature may impact the organs  
15 within the thoracic cage, including the heart. Cardiac abnormalities in idiopathic  
16 scoliosis patients are often studied post-corrective surgery or secondary to diseases.  
17 To investigate cardiac structure, function, and outcomes in participants with  
18 scoliosis, phenotype and imaging data of the UK Biobank (UKB) adult population  
19 cohort was analysed.

20 Methods: Hospital episode statistics of 502,324 adults were analysed to identify  
21 participants with scoliosis. Summary 2D cardiac phenotypes from 39,559 cardiac  
22 magnetic resonance imaging (CMR) scans were analysed alongside a 3D surface-  
23 to-surface (S2S) analysis.

24 Results: A total of 4,095 (0.8%, 1 in 120) UKB participants were identified to have all-  
25 cause scoliosis. These participants had increased lifetime risk of major adverse  
26 cardiac events (MACE) (HR=1.45,  $P<0.001$ ), driven by heart failure (HR=1.58,  
27  $P<0.001$ ) and atrial fibrillation (HR=1.54,  $P<0.001$ ). Increased radial and decreased  
28 longitudinal peak diastolic strain rates were identified in participants with scoliosis  
29 (+0.29,  $P_{\text{adj}}<0.05$ ; -0.25,  $P_{\text{adj}}<0.05$ ; respectively). Cardiac compression of the top and  
30 bottom of the heart and decompression of the sides was observed through S2S  
31 analysis. Additionally, associations between scoliosis and older age, female sex,  
32 heart failure, valve disease, hypercholesterolemia, hypertension, and decreased  
33 enrolment for CMR, were identified.

34 Conclusion: The spinal curvature observed in participants with scoliosis alters the  
35 movement of the heart. The association with increased MACE may have clinical

36 implications for whether to undertake surgical correction. This work identifies, in an  
37 adult population, evidence for altered cardiac function and increased lifetime risk of  
38 MACE in participants with scoliosis. Future genetic analyses would aid to assess  
39 causality.

40 **Keywords:** Scoliosis, heart, MACE, UK Biobank

41

## 42 Introduction

43 Scoliosis is the lateral curvature of the spine with a Cobb angle  $>10^\circ$ , primarily  
 44 diagnosed in adolescents[1]. There are multiple aetiologies of scoliosis including  
 45 neuromuscular, congenital, syndromic, or secondary to other diseases such as  
 46 muscular dystrophy or Friedreich's ataxia[2]. However, the most common type is  
 47 idiopathic scoliosis, with a prevalence of 8% in adults aged over 40 years old[3–5]. In  
 48 later life, scoliosis can result from skeletal muscle diseases such as sarcopenia.  
 49 Sarcopenia is the loss of muscle mass associated with age that may cause  
 50 imbalance and alteration on the supportive muscles of the spine, contributing to the  
 51 progression of degenerative scoliosis in elderly patients[6,7]. Degenerative scoliosis  
 52 is observed in 68% of adults aged over 60 years old, as the joints and disks of the  
 53 spine begin to deteriorate[7]. Osteopenia, loss of bone density, is more frequently  
 54 observed in females and contributes to the severity of the curvature of the spine[8].  
 55 Furthermore, the coexistence of congenital heart disease (CHD) and spinal  
 56 curvature is found in up to 12% of infant and juvenile scoliosis patients presenting  
 57 with CHD[9,10]. This is likely due to shared developmental aetiology, whereas  
 58 studies are lacking on the impact of age-related scoliosis on the functioning of a  
 59 developmentally normal heart.

60

61 In addition to impacting physical day-to-day activities, structural disruption of the  
 62 thoracic cage (pectus deformity) can influence the organs within, such as the  
 63 heart[11]. Pectus deformities lead to the displacement of the heart towards the left  
 64 side of the body which can result in right-sided spinal curvatures as the beating heart  
 65 pushes the thoracic vertebrae to the right[7,11]. Furthermore, the degree of  
 66 curvature of the spine can greatly increase the risk of restrictive lung disease, which

67 in conjunction with intrathoracic organ displacement, increases the risk of  
68 comorbidities with high mortality rates, such as right heart failure[3,12].

69

70 The impact of scoliosis on adult cardiac function has not been extensively studied  
71 and the relationship between scoliosis and non-congenital cardiac manifestations is  
72 not well characterised. In the UK Biobank adult population cohort, we explored  
73 whether all-cause scoliosis has an impact on or relationship with cardiac phenotypes  
74 of the matured adult heart. We identify altered radial and longitudinal peak diastolic  
75 strain rates and an increased lifetime risk of major adverse cardiovascular effects  
76 (MACE) in participants with scoliosis in the UK Biobank. In addition, we observe  
77 associations between scoliosis and older age, female sex, heart failure, valve  
78 disease, hypercholesterolemia, diagnosis of hypertension, and decreased enrolment  
79 for cardiac magnetic resonance imaging.

## 80 **Methods**

### 81 *The UK Biobank population cohort*

82 The UK Biobank (UKB) recruited over 500,000 participants aged 40-69 years across  
83 the UK between 2006-2010 (National Research Ethics Service, 11/NW/0382,  
84 21/NW/0157)[13]. This project was conducted under the UK Biobank applications  
85 47602 and 40616. All participants provided written informed consent[14].

86

### 87 *UK Biobank codes for identification of scoliosis*

88 A diagnosis of scoliosis was identified for UKB participants through the first  
89 occurrence of scoliosis trait (M41\*), a composite trait of the first reported date  
90 derived by the UKB that incorporates data from primary care, hospital inpatient  
91 admissions, death records, and self-reported medical conditions (**Table 2**).

92

### 93 *Cardiac magnetic resonance imaging data*

94 Amongst all UKB participants, 39,559 participants had cardiac MRI (CMR) data  
95 available[15]. Imaging was performed using a 1.5 Tesla machines (MAGNETOM  
96 Aera, Siemens Healthcare)[15], and 2D summary CMR traits were analysed for an  
97 association with scoliosis. This includes left ventricular ejection fraction (LVEF), left  
98 ventricular end systolic volume (LVESV), left ventricular end diastolic volume  
99 (LVEDV), and measures of cardiac strain: Eulerian radial strain (Err), Eulerian  
100 longitudinal strain (Ell), Eulerian circumferential strain (Ecc), radial peak diastolic  
101 strain rate (PDSR<sub>rr</sub>), and longitudinal peak diastolic strain rate (PDRS<sub>ll</sub>). All CMR  
102 traits were adjusted for age at the time of imaging, sex, White British ancestry,  
103 systolic blood pressure (SBP), and body surface area (BSA).

104

## *Surface to surface analysis*

A mass univariate regression was utilised to explore associations between the three-dimensional (3D) mesh-derived phenotype and scoliosis[16–19]. The underlying principle of this approach is the implementation of a linear regression at each vertex of the 3D atlas to derive a regression coefficient associated with the variable of interest, which results in a map of beta-coefficients showing the strength and direction of these associations. The analysis was adjusted for age at the time of imaging, sex, White British ancestry, BSA, diastolic blood pressure (DBP), and SBP.

## *Lifetime risk and survival analyses*

Lifetime risk of disease, from birth month to January 2021, was assessed using the first occurrence of scoliosis trait (M41\*). The first occurrence of health outcomes summary data in the UKB is reported using ICD10 codes[13]. The fields analysed for the major adverse cardiovascular events (MACE) composite trait were as follows: cardiac arrest, I46\*; atrial fibrillation and flutter/arrhythmia: I48\* and I49\*; heart failure, I50\*; and stroke, I64\*, as previously published[20]. The survival analysis was conducted using MACE and death as the primary outcome. *Survival* and *survminer* R packages were used to estimate hazard ratios (HR).

## *Statistical analysis*

R programming language (version 3.6.0) and RStudio software (version 1.3.1073) were used for analyses. Categorical variables were assessed using Chi-Squared Test or Fisher's Exact Test and expressed as percentages. Continuous variables were assessed using Student's t-test and expressed as mean  $\pm$  standard deviation

129 (SD). All P-values were adjusted using Bonferroni correction for multiple  
130 comparisons where  $P_{\text{adj}} < 0.05$  was deemed significant.

131 In the association of disease analysis, all variables were adjusted for age at  
132 recruitment (UKB ID: 21022-0.0) and genetic data-derived sex (UKB ID:22001-0.0)  
133 using a multiple linear regression model. A separate multiple linear regression model  
134 for CMR traits was used to adjust for covariates at the time of imaging: age, sex,  
135 White British ancestry, SBP, and BSA.



## Results

### *Prevalence of scoliosis in the UK Biobank*

The prevalence of all-cause scoliosis in 502,324 participants of the UKB was 1 in 120 (n=4,095; 0.8%). Of the 4,095 participants with scoliosis, 1,489 (37%) were diagnosed with scoliosis prior recruitment. From the total participants with scoliosis, 10 (0.2%) reported congenital scoliosis, 23 (0.6%) reported childhood scoliosis (infantile and juvenile) and the rest reported scoliosis due to other causes later in life. The most common scoliosis subtype was unspecified scoliosis reported by 2,685 (65.6%) participants (**Table 2**).

Participants with scoliosis were significantly older than the rest of the population (59.4 years old  $\pm$  7.58; mean age 56.5 years old  $\pm$  8.10;  $P_{adj}<0.01$ ) and were more female (69% female in scoliosis cohort; 55% female in the rest of the UKB population;  $P_{adj}<0.01$ ). Lifetime risk analysis showed that participants with scoliosis had significantly longer lives when compared to the rest of the population, regardless of sex (**Figure 1**).

We observed a significantly increased burden of heart failure (+4%,  $P_{adj}<0.001$ ), valve disease (+1%,  $P_{adj}<0.001$ ), hypercholesterolemia (+7%,  $P_{adj}<0.001$ ) and diagnosis of hypertension (+13%,  $P_{adj}<0.001$ ) in scoliosis participants, adjusted for age and sex (**Table 2**). Although diagnosis of hypertension was significantly increased, no significant differences were found with SBP or DBP, which may be due to correction of diagnosed hypertension through medication. Additionally, the proportion of scoliosis participants with CMR available was significantly decreased (-3%,  $P_{adj}<0.001$ ) compared to the rest of the population.

161

162 *CMR analysis of participants with scoliosis identifies altered cardiac diastolic strain*

163 2D summary CMR traits were available on 39,559 participants[15]. 224 participants  
164 with scoliosis had CMR available and had significantly increased radial PDSR  
165 ( $P_{adj}<0.05$ ) and decreased longitudinal PDSR ( $P_{adj}<0.05$ ) compared to participants  
166 without a diagnosis of scoliosis (**Table 3**). Adequate diastolic function is essential  
167 during ventricular filling and maintenance of optimum stroke volume. PDSR is a  
168 diastolic function trait, that has been previously associated with major adverse  
169 cardiovascular events, increased mortality, increased blood pressure and altered left  
170 atrial function [21]. For example, decreased PDSR<sub>rr</sub> corresponds to stiffer ventricle,  
171 impairing its relaxation and increasing the risk of heart failure[21]. No additional  
172 significant associations were found with the other CMR measures available for  
173 analysis and no association was observed between scoliosis and diabetes (**Table 1**).

174

175 *Surface to surface analysis of participants with scoliosis shows increased cardiac*  
176 *compression*

177 A 3D surface-to-surface analysis was performed on 21,088 participants of the cohort.  
178 The three-dimensional cardiac modelling of scoliosis patients showed increased  
179 strain at the top and bottom of the heart (**Figure 2**). Radial cardiac decompression  
180 (sides of the heart) was also observed in participants with scoliosis. However, these  
181 were not significant when adjusting for the number of comparisons and covariates.

182

183 *Lifetime risk of MACE is increased in participants with scoliosis*

184 A significantly increased lifetime risk of MACE was observed for UKB participants  
185 with scoliosis (**Figure 3**; HR=1.45,  $P<0.001$ ), mainly driven by heart failure

186 (HR=1.58,  $P<0.001$ ) and atrial fibrillation (HR=1.54,  $P<0.001$ ). The probability of  
187 MACE doubled in males into older age (from 60 years of age). This may be caused  
188 through the altered cardiac diastolic strain rates observed in participants with  
189 scoliosis. However, we emphasise caution regarding the causality of this association  
190 of scoliosis and MACE at this stage.

## Discussion

### *Participants with scoliosis have increased lifetime risk of MACE*

To the best of our knowledge, this is the first study to identify an increased lifetime risk of MACE, through atrial fibrillation and heart failure, in participants with scoliosis. This may be through the identified, significantly increased PDSR<sub>rr</sub> and decreased PDSR<sub>ll</sub>. The abnormal curvature of the spine can increase mechanical constraint on the heart which may result in diastolic dysfunction[22] and the severity of the spinal deformity has been shown to aggravate ventricular and right atrial pressure[3].

It is unlikely that the observed heart failure is due to blood pressure abnormalities as no significant differences were found in measured SBP and DBP between participants with scoliosis and the rest of the population. However, it is possible that pulmonary dysfunction may be eliciting cardiac dysfunction alongside atrial fibrillation, in patients with advanced scoliosis[3,11,23]. These findings suggest that early medical intervention in patients with scoliosis through surgery, may decrease the risk of a future MACE, however future validation of this finding would need to be confirmed in a scoliosis case cohort. It may be possible that scoliosis develops secondary to other diseases that could also increase the risk of MACE. Future genetic analyses would be beneficial to assess causality through Mendelian randomisation techniques. Likewise, studies are required to determine whether the cardiovascular changes observed are reversible with scoliosis treatment surgery.

A previous study assessed 201 scoliosis patients for cardiopulmonary changes following corrective scoliosis surgeries and suggested that untreated scoliosis can result in pulmonary dysfunction and subsequently lead to right heart failure,

increasing mortality[3]. Postoperative normalisation of cardiac measures was observed in this study, highlighting the potential benefits of surgical correction of scoliosis on cardiac function[3]. Additionally, a long-term follow-up study showed increased risk of pulmonary limitations such as shortness of breath in patients with untreated scoliosis, aggravated by spinal curvature[24].

It is challenging to accurately assess the cardiac function of scoliosis patients, due to the heart being displaced[22] and participants with scoliosis in the UKB had significantly less CMR scans available, possibly due to lack of comfort for prolonged periods of time in MRI machines. Adaptations may be required to allow patients with scoliosis to undergo MRI scans more comfortably, to further assess any alteration in cardiac function in scoliosis patients.

#### *Participants with scoliosis have altered cardiac diastolic strain rates*

In the UKB, participants with scoliosis showed increased pressure at the top and bottom of the heart, as well as elongation of the sides of the heart. These results concur with the 2D-derived CMR findings of significantly increased  $PDSR_{rr}$  and decreased  $PDSR_{ll}$ . A reduced  $PDSR_{ll}$  has been previously associated with reduced left atrial function[21]. No significant associations were found with the other studied CMR traits, suggesting that this compression does not alter blood flow through the heart. This altered cardiac strain may be explained by the deformity of the thoracic cage in scoliosis limiting cardiac diastolic movement. The mechanical abnormalities of the thoracic spine as well as the impact on the pulmonary system, may be the primary cause of the heart involvement[25,26]. Secondary involvement via altered pulmonary haemodynamics may be possible, where spinal curvature impacts

pulmonary pressures leading to pulmonary hypertension. Likewise, direct compression of the myocardium could occur in conjunction to pulmonary involvement. These events can contribute to the development of cardiac consequences in scoliosis patients[27]. It would be beneficial to include cardiac follow-ups in patients with scoliosis to observe any cardiac alterations as scoliosis progresses, ensuring early intervention.

#### *Prevalence of scoliosis in the UK Biobank*

We report a prevalence of scoliosis of 0.8% in the UKB population cohort. Previous literature has reported a scoliosis prevalence of 8% in adult volunteers aged over 40 years old[5]. Patients included in the previous clinical study were recruited on evaluation of bone mineral density and thus were likely at increased risk of scoliosis. Additionally, this discrepancy may be due to limitations of the UKB cohort (see *Limitations*).

Participants with scoliosis in the UKB are more elderly compared to the rest of the population, regardless of sex. Scoliosis occurs alongside other diseases such as osteoporosis or degenerative spine disorders with increasing age[5].

In the UKB cohort, scoliosis is more commonly found in females than males (2.5:1), which agrees with a previous scoliosis case cohort study of adolescents and adults that reported a ratio of scoliosis in females to males as 2:1[28]. Although not fully understood, there are different theories linking the higher prevalence of scoliosis in females, including implication of the autonomic nervous system (ANS) in skeletal growth and/or puberty through leptin hormone, which has been found decreased in

female patients with idiopathic scoliosis[1,29,30]. The role of leptin in scoliosis is not fully understood, and analyses to determine causality would aid our current understanding of the mechanisms behind scoliosis. Furthermore, it has been reported that approximately 30% of females (n=324) suffer from systemic osteopenia which strongly contributes to the progression of spinal curvature in adolescent females following skeletal maturity[8].

### *Limitations*

The participants in the UKB cohort were recruited at 40-69 years of age and most participants are of European ancestry. Selection bias for inclusion in CMR sub cohort may have excluded more severe scoliosis participants from study. In addition, discrimination of scoliosis aetiology was mostly unspecified.

### **Conclusions**

This work describes for the first time in an adult population, evidence for altered cardiac function in adult participants with scoliosis. We identified altered diastolic strain, increased lifetime risk of MACE driven by HF and atrial fibrillation and observed cardiac compression in the UK Biobank participants with scoliosis. Further research is required to follow up the role of scoliosis in cardiac manifestations in a clinical setting.

## **Data and code availability**

UK Biobank (<https://www.ukbiobank.ac.uk/>) population reference datasets are publicly available. All analysis code will be available on GitHub (<https://github.com/ImperialCardioGenetics/Scoliosis>)

## **Competing interests**

J.S.W. has consulted for MyoKardia, Inc., Foresite Labs, and Pfizer. D.P.O. has consulted for Bayer.

## **Acknowledgements and funding sources**

This work was supported by the Wellcome Trust [107469/Z/15/Z; 200990/A/16/Z], Medical Research Council (UK), British Heart Foundation [RG/19/6/34387, RE/18/4/34215], and the NIHR Imperial College Biomedical Research Centre. The views expressed in this work are those of the authors and not necessarily those of the funders. For open access, the authors have applied a CC BY public copyright license to any Author Accepted Manuscript version arising from this submission.

## **CRedit statement**

Conceptualization: K.A.M.; Methodology: K.A.M, V.Q.S.; Formal Analysis: V.Q.S., A.C.; Resources: J.S.W., D.O'R.; Data curation: V.Q.S., K.A.M.; Writing – original draft: V.Q.S.; Writing – review & editing: A.C., D.O'R., J.S.W., K.A.M.; Visualization: V.Q.S.; Supervision: K.A.M., J.S.W.



## References

- 1 Cheng JC, Castelein RM, Chu Winnie, *et al.* Adolescent idiopathic scoliosis. *Nat Rev Dis Primers* 2015;**1**:15030. doi:10.1038/nrdp.2015.30
- 2 Rummey C, Flynn JM, Corben LA, *et al.* Scoliosis in Friedreich's ataxia: longitudinal characterization in a large heterogeneous cohort. *Ann Clin Transl Neurol* 2021;**8**:1239–50. doi:10.1002/acn3.51352
- 3 Sarwahi V, Galina J, Atlas A, *et al.* Scoliosis Surgery Normalizes Cardiac Function in Adolescent Idiopathic Scoliosis Patients. *Spine (Phila Pa 1976)* 2021;**46**:E1161–7. doi:10.1097/BRS.0000000000004060
- 4 Trobisch P, Suess O, Schwab F. Idiopathic Scoliosis. *Dtsch Arztebl* 2010;**107**:875–84. doi:10.3238/arztebl.2010.0875
- 5 Kebaish KM, Neubauer PR, Voros GD, *et al.* Scoliosis in adults aged forty years and older: Prevalence and relationship to age, race, and gender. *Spine (Phila Pa 1976)* 2011;**36**:731–6. doi:10.1097/BRS.0b013e3181e9f120
- 6 Aftzoglou P. Sarcopenia and falls in patients with adult scoliosis. *J Frailty Sarcopenia Falls* 2017;**02**:83–7. doi:10.22540/jfsf-02-083
- 7 Konieczny MR, Senyurt H, Krauspe R. Epidemiology of adolescent idiopathic scoliosis. *J Child Orthop* 2013;**7**:3–9. doi:10.1007/s11832-012-0457-4
- 8 Hung VWY, Qin L, Cheung CSK, *et al.* Osteopenia: A new prognostic factor of curve progression in adolescent idiopathic scoliosis. *Journal of Bone and Joint Surgery* 2005;**87**:2709–16. doi:10.2106/JBJS.D.02782
- 9 Bülbül S, Benli İT, Güler M, *et al.* Scoliosis prevalence in congenital heart disease patients. *Turkish Spine* 2013;**24**:3–12.
- 10 Kaito T, Shimada M, Ichikawa H, *et al.* Prevalence of and Predictive Factors for Scoliosis After Surgery for Congenital Heart Disease in the First Year of Life. *Journal of Bone and Joint Surgery* 2018;**3**:e0045. doi:10.2106/JBJS.OA.17.00045
- 11 Wang Y, Chen G, Xie L, *et al.* Mechanical factors play an important role in pectus excavatum with thoracic scoliosis. *J Cardiothorac Surg* 2012;**7**:2–4. doi:10.1186/1749-8090-7-118
- 12 Swank SM, Winter RB, Moe JH. Scoliosis and Cor Pulmonale. *Spine (Phila Pa 1976)* 1982;**7**:343–54. doi:0.1097/00007632-198207000-00004
- 13 Sudlow C, Gallacher J, Allen N, *et al.* UK Biobank: An Open Access Resource for Identifying the Causes of a Wide Range of Complex Diseases of Middle and Old Age. *PLoS Med* 2015;**12**:1–10. doi:10.1371/journal.pmed.1001779
- 14 Szustakowski JD, Balasubramanian S, Sasson A, *et al.* Advancing Human Genetics Research and Drug Discovery through Exome Sequencing of the UK Biobank. *medRxiv* Published Online First: 2020. doi:10.1101/2020.11.02.20222232
- 15 Bai W, Suzuki H, Huang J, *et al.* A population-based phenome-wide association study of cardiac and aortic structure and function. *Nat Med* 2020;**26**:1654–62. doi:10.1038/s41591-020-1009-y

- 347 16 Schafer S, de Marvao A, Adami E, *et al.* Titin-truncating variants affect heart  
348 function in disease cohorts and the general population. *Nat Genet* 2017;**49**:46–  
349 53. doi:10.1038/ng.3719
- 350 17 Biffi C, de Marvao A, Attard MI, *et al.* Three-dimensional cardiovascular  
351 imaging-genetics: A mass univariate framework. *Bioinformatics* 2018;**34**:97–  
352 103. doi:10.1093/bioinformatics/btx552
- 353 18 Duan J, Ghalib B, Schlemper J, *et al.* Europe PMC Funders Group Automatic  
354 3D bi-ventricular segmentation of cardiac images by a shape-refined multi-task  
355 deep learning approach. 2019;**38**:2151–64.  
356 doi:10.1109/TMI.2019.2894322.
- 357 19 Meyer H v, Dawes TJW, Serrani M, *et al.* Europe PMC Funders Group Genetic  
358 and functional insights into the fractal structure of the heart. *Nature*  
359 2021;**584**:589–94. doi:10.1038/s41586-020-2635-8.
- 360 20 McGurk KA, Zheng SL, Henry A, *et al.* Correspondence on “ACMG SF v3.0 list  
361 for reporting of secondary findings in clinical exome and genome sequencing:  
362 a policy statement of the American College of Medical Genetics and Genomics  
363 (ACMG)” by Miller *et al.* *Genetics in Medicine* 2022;**24**:744–6.  
364 doi:10.1016/j.gim.2021.10.020
- 365 21 Thanaj M, Mielke J, McGurk KA, *et al.* Genetic and environmental  
366 determinants of diastolic heart function. *Nature Cardiovascular Research*  
367 2022;**1**:361–71. doi:10.1038/s44161-022-00048-2
- 368 22 Li S, Yang J, Zhu L, *et al.* Ventricular and atrial mechanics and their interaction  
369 in patients with congenital scoliosis without clinical heart failure. *Cardiol Young*  
370 2014;**760**:976–83. doi:10.1017/S1047951114001504
- 371 23 Mauro A lo, Aliverti A. Physiology of respiratory disturbances in muscular  
372 dystrophies. *Breathe* 2016;**12**:318–27. doi:10.1183/20734735.012716
- 373 24 Hawes MC, Weinstein SL. Health and Function of Patients with Untreated  
374 Idiopathic Scoliosis. *J Am Med Assoc* 2003;**289**:2644–5.  
375 doi:10.1001/jama.289.20.2644-a
- 376 25 Janicki JA, Frcsc BA. Scoliosis: Review of diagnosis and treatment. *Paediatric*  
377 *Child Health* 2007;**12**:771–6.
- 378 26 Prof A. Pulmonary Functions in Patients With Idopathic Scoliosis.  
379 2017;**90**:123–8.
- 380 27 Li Q, Zeng F, Chen T, *et al.* Management of Severe Scoliosis with Pulmonary  
381 Arterial Hypertension: A Single-Center Retrospective Case Series Study.  
382 *Geriatr Orthop Surg Rehabil* 2022;**13**:1–11. doi:10.1177/21514593221080279
- 383 28 Lang C, Wang R, Chen Z, *et al.* Incidence and Risk Factors of Cardiac  
384 Abnormalities in Patients with Idiopathic Scoliosis. *World Neurosurg*  
385 2019;**125**:e824–8. doi:10.1016/j.wneu.2019.01.177
- 386 29 Man GCW, Tam EMS, Wong YS, *et al.* Abnormal Osteoblastic Response to  
387 Leptin in Patients with Adolescent Idiopathic Scoliosis. *Sci Rep* 2019;**9**:1–7.  
388 doi:10.1038/s41598-019-53757-3

- 389 30 Wang Q, Wang C, Hu W, *et al.* Disordered leptin and ghrelin bioactivity in  
390 adolescent idiopathic scoliosis (AIS): a systematic review and meta-analysis. *J*  
391 *Orthop Surg Res* 2020;**15**:1–9. doi:10.1186/s13018-020-01988-w  
392  
393

## 394 Tables

### 395 Table 1 Summary statistics of participants with scoliosis compared to the rest 396 of the UK Biobank population cohort.

397 Data is presented as mean  $\pm$  SD or count (%); all the variables are adjusted for age  
398 and sex; BMI, body mass index; SBP, systolic blood pressure; DBP, diastolic blood  
399 pressure; CMR, cardiac magnetic resonance imaging; CM, cardiomyopathy. White  
400 British ancestry was genetically inferred.  $P_{adj}$ , P-value adjusted for multiple  
401 comparisons via Bonferroni correction; Significant,  $P_{adj}<0.05$ ; NS, not significant,  
402  $P_{adj}>0.05$ .

| Characteristic              | General<br>population<br>(n=502,324) | Scoliosis<br>carriers<br>(n=4,095) | $P_{adj}$ |
|-----------------------------|--------------------------------------|------------------------------------|-----------|
| Age at recruitment          | 56.50 $\pm$ 8.10                     | 59.40 $\pm$ 7.58                   | <0.001    |
| White British               | 406,131 (81%)                        | 3344 (82%)                         | NS        |
| Sex, female                 | 261,862 (55%)                        | 2,845 (69%)                        | <0.001    |
| BMI                         | 27.40 $\pm$ 4.80                     | 27.00 $\pm$ 5.16                   | NS        |
| Auto SBP                    | 140.00 $\pm$ 19.60                   | 141.00 $\pm$ 20.00                 | NS        |
| Auto DBP                    | 82.20 $\pm$ 10.70                    | 81.50 $\pm$ 10.80                  | NS        |
| Diabetes                    | 27,771 (5%)                          | 212 (5%)                           | NS        |
| Hypercholesterolaemia       | 92,824 (18%)                         | 1,022 (25%)                        | <0.001    |
| Hypertension                | 167,817 (33%)                        | 1,902 (46%)                        | <0.001    |
| Included in UKBB CMR cohort | 39,319 (8%)                          | 224 (5%)                           | <0.001    |
| Heart failure               | 10,504 (2%)                          | 237 (6%)                           | <0.001    |
| Any CM                      | 3,602 (0.7%)                         | 49 (2%)                            | NS        |
| Valve disease               | 5,145 (1%)                           | 96 (2%)                            | <0.001    |

403

**Table 2: Codes used for identification of all-cause scoliosis.**

The HES data is coded using the International statistical Classification of Disease (ICD) codes, versions 9 and 10. The self-reported data (SR) has a UKB-specific coding system. SR, non-cancer illness code, self-reported data; ICD9, summary diagnoses (main and secondary); ICD10, underlying primary cause of death, contributory cause of death, and external cause of death, summary diagnoses (main and secondary); GP, general practitioner.

| Disease/phenotype                            | Participants<br>(n=4,095) | Coding system                                                                                                                                                 |
|----------------------------------------------|---------------------------|---------------------------------------------------------------------------------------------------------------------------------------------------------------|
| Self-reported scoliosis                      | 468 (11.4%)               | SR: 1535                                                                                                                                                      |
| Kyphoscoliosis and scoliosis                 | 5 (0.1%)                  | ICD9: 7373, 75420                                                                                                                                             |
| Congenital postural scoliosis                | 0 (%)                     |                                                                                                                                                               |
| Congenital scoliosis                         | 10 (0.2%)                 | ICD10: Q763, M965, M41, M410, M4100-109, M411, M4110-119, M412, M4120-129, M413, M410-139, M414, M1410-149, M415, M1450-159, M418, M4180-189, M419, M4190-199 |
| Post-radiation scoliosis                     | 10 (0.2%)                 |                                                                                                                                                               |
| Childhood scoliosis (infantile and juvenile) | 23 (0.6%)                 |                                                                                                                                                               |
| Other idiopathic scoliosis                   | 56 (1.4%)                 |                                                                                                                                                               |
| Thoracogenic scoliosis                       | 24 (0.6%)                 |                                                                                                                                                               |
| Neuromuscular scoliosis                      | 22 (0.6%)                 |                                                                                                                                                               |
| Secondary scoliosis                          | 79 (2%)                   |                                                                                                                                                               |
| Other forms of scoliosis                     | 226 (5.5%)                |                                                                                                                                                               |
| Unspecified scoliosis                        | 2685 (65.5%)              |                                                                                                                                                               |
| Unspecified scoliosis                        | 487 (11.9%)               | GP-derived                                                                                                                                                    |

**Table 3: Summary of the altered cardiac PDSR in participants of the UKB with scoliosis.**

Mean and standard deviation for adjusted PDSRs are described for the general UKB population and participants with all-cause scoliosis. The p-value was adjusted for multiple comparisons of CMR traits. WT, wall thickness; LVEDV, left ventricular end-diastolic volume; LVEF, left ventricular ejection fraction; LVM, left ventricular mass; Ecc, circumferential; Err, radial; Ell, longitudinal; PDSR<sub>ll</sub>, longitudinal peak diastolic strain rate; PDSR<sub>rr</sub>, radial peak diastolic strain rate.

| CMR trait          | General population<br>(n=38,319) | Scoliosis<br>(n=224) | P <sub>adj</sub> |
|--------------------|----------------------------------|----------------------|------------------|
| Maximum WT         | 9.40 ± 1.62                      | 9.36 ± 1.70          | NS               |
| LVEDV              | 148.00 ± 33.90                   | 136.00 ± 32.80       | NS               |
| LVEF               | 59.50 ± 6.16                     | 59.80 ± 6.03         | NS               |
| LVM                | 86.0 ± 22.30                     | 78.00 ± 20.70        | NS               |
| Ecc Global         | (-22.33) ± 3.35                  | (-22.10) ± 3.77      | NS               |
| Err Global         | 45.00 ± 8.31                     | 45.20 ± 8.73         | NS               |
| Ell Global         | (-18.50) ± 2.76                  | (-17.90 ) ± 2.44     | NS               |
| PDSR <sub>ll</sub> | 1.66 ± 0.61                      | 1.45 ± 0.58          | <0.05            |
| PDSR <sub>rr</sub> | -5.64 ± 2.09                     | -5.08 ± 2.13         | <0.05            |

## 422 **Figure legends**

### 423 **Figure 1: Scoliosis is associated with longer life compared to the rest of the** 424 **UKB cohort, adjusted for sex.**

425 Years of life is shown on the x-axis from date of birth. Counts of UKB participants are  
426 shown in the box depicting number at risk. The median survival time (a survival  
427 probability of 0.5) was significantly increased in participants with scoliosis, regardless  
428 of sex. Median survival time for females with scoliosis vs females without scoliosis (2  
429 years difference); median survival time for males with scoliosis vs males without  
430 scoliosis (1.5 years difference).

### 431 **Figure 2 Surface to surface analysis suggests a compressed heart in** 432 **participants with scoliosis.**

433 3D models of left ventricle geometry with standardized beta-coefficients which show  
434 the association between scoliosis and regional surface-to-surface distance. Blue,  
435 increased inward pressure; red, increased outwards pressure.

### 436 **Figure 3: Increased lifetime risk of MACE in UKB participants with scoliosis.**

437  
438 A, cumulative incidence curve depicts an increase in lifetime risk of MACE in  
439 participants with scoliosis over time (HR=1.45, P<0.001). B, incidence curve  
440 stratified by sex (HR=1.63, P<0.001).



# Exploration of the impact of scoliosis on the heart in the UK Biobank

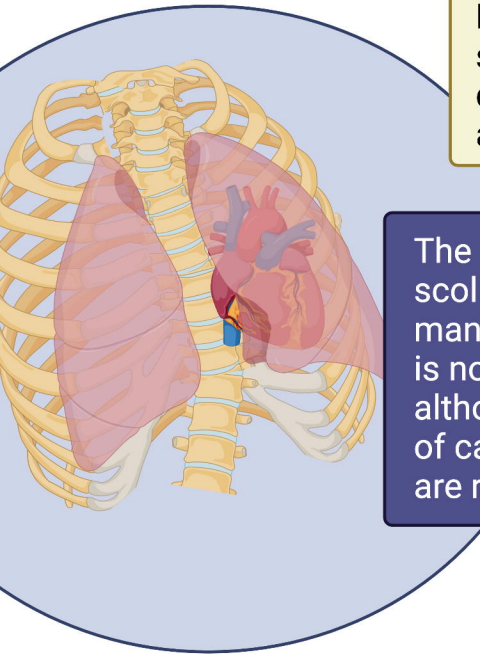

Pectus deformities in scoliosis can cause displacement of heart and lungs

The relationship between scoliosis and cardiac manifestations in adults is not well characterised, although a high incidence of cardiac abnormalities are reported.

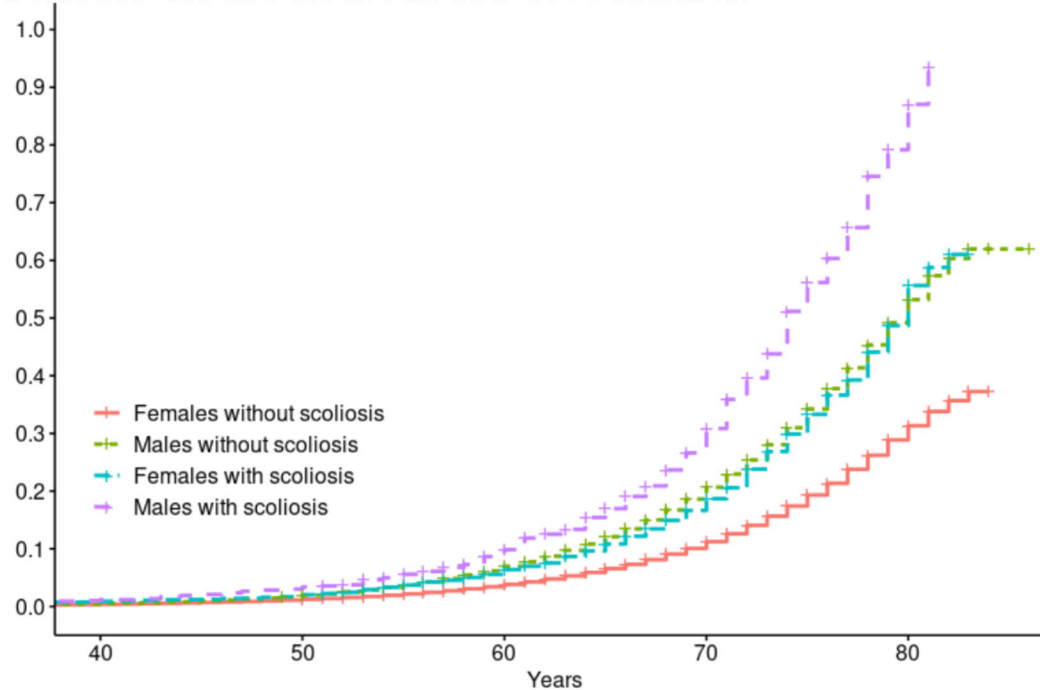

4,095 (1 in 120) participants have scoliosis in the UK Biobank with:  
Increased risk of major adverse cardiovascular events (HR=1.63)  
Mainly driven by heart failure (HR=1.58) and atrial fibrillation (HR=1.54)

## Cardiac magnetic resonance imaging

Diastole

No spinal curvature

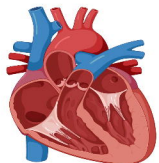

Scoliosis

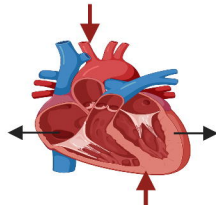

## Surface to surface analysis

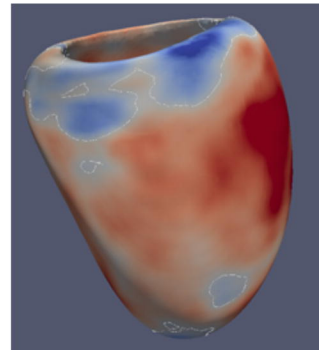

Identification of increased cardiac compression on the top and bottom of the heart, and radial cardiac decompression (sides of the heart) in scoliosis patients.

## Conclusion:

This work identifies, in an adult population, the evidence for altered cardiac function and increased lifetime risk of MACE in participants with scoliosis.



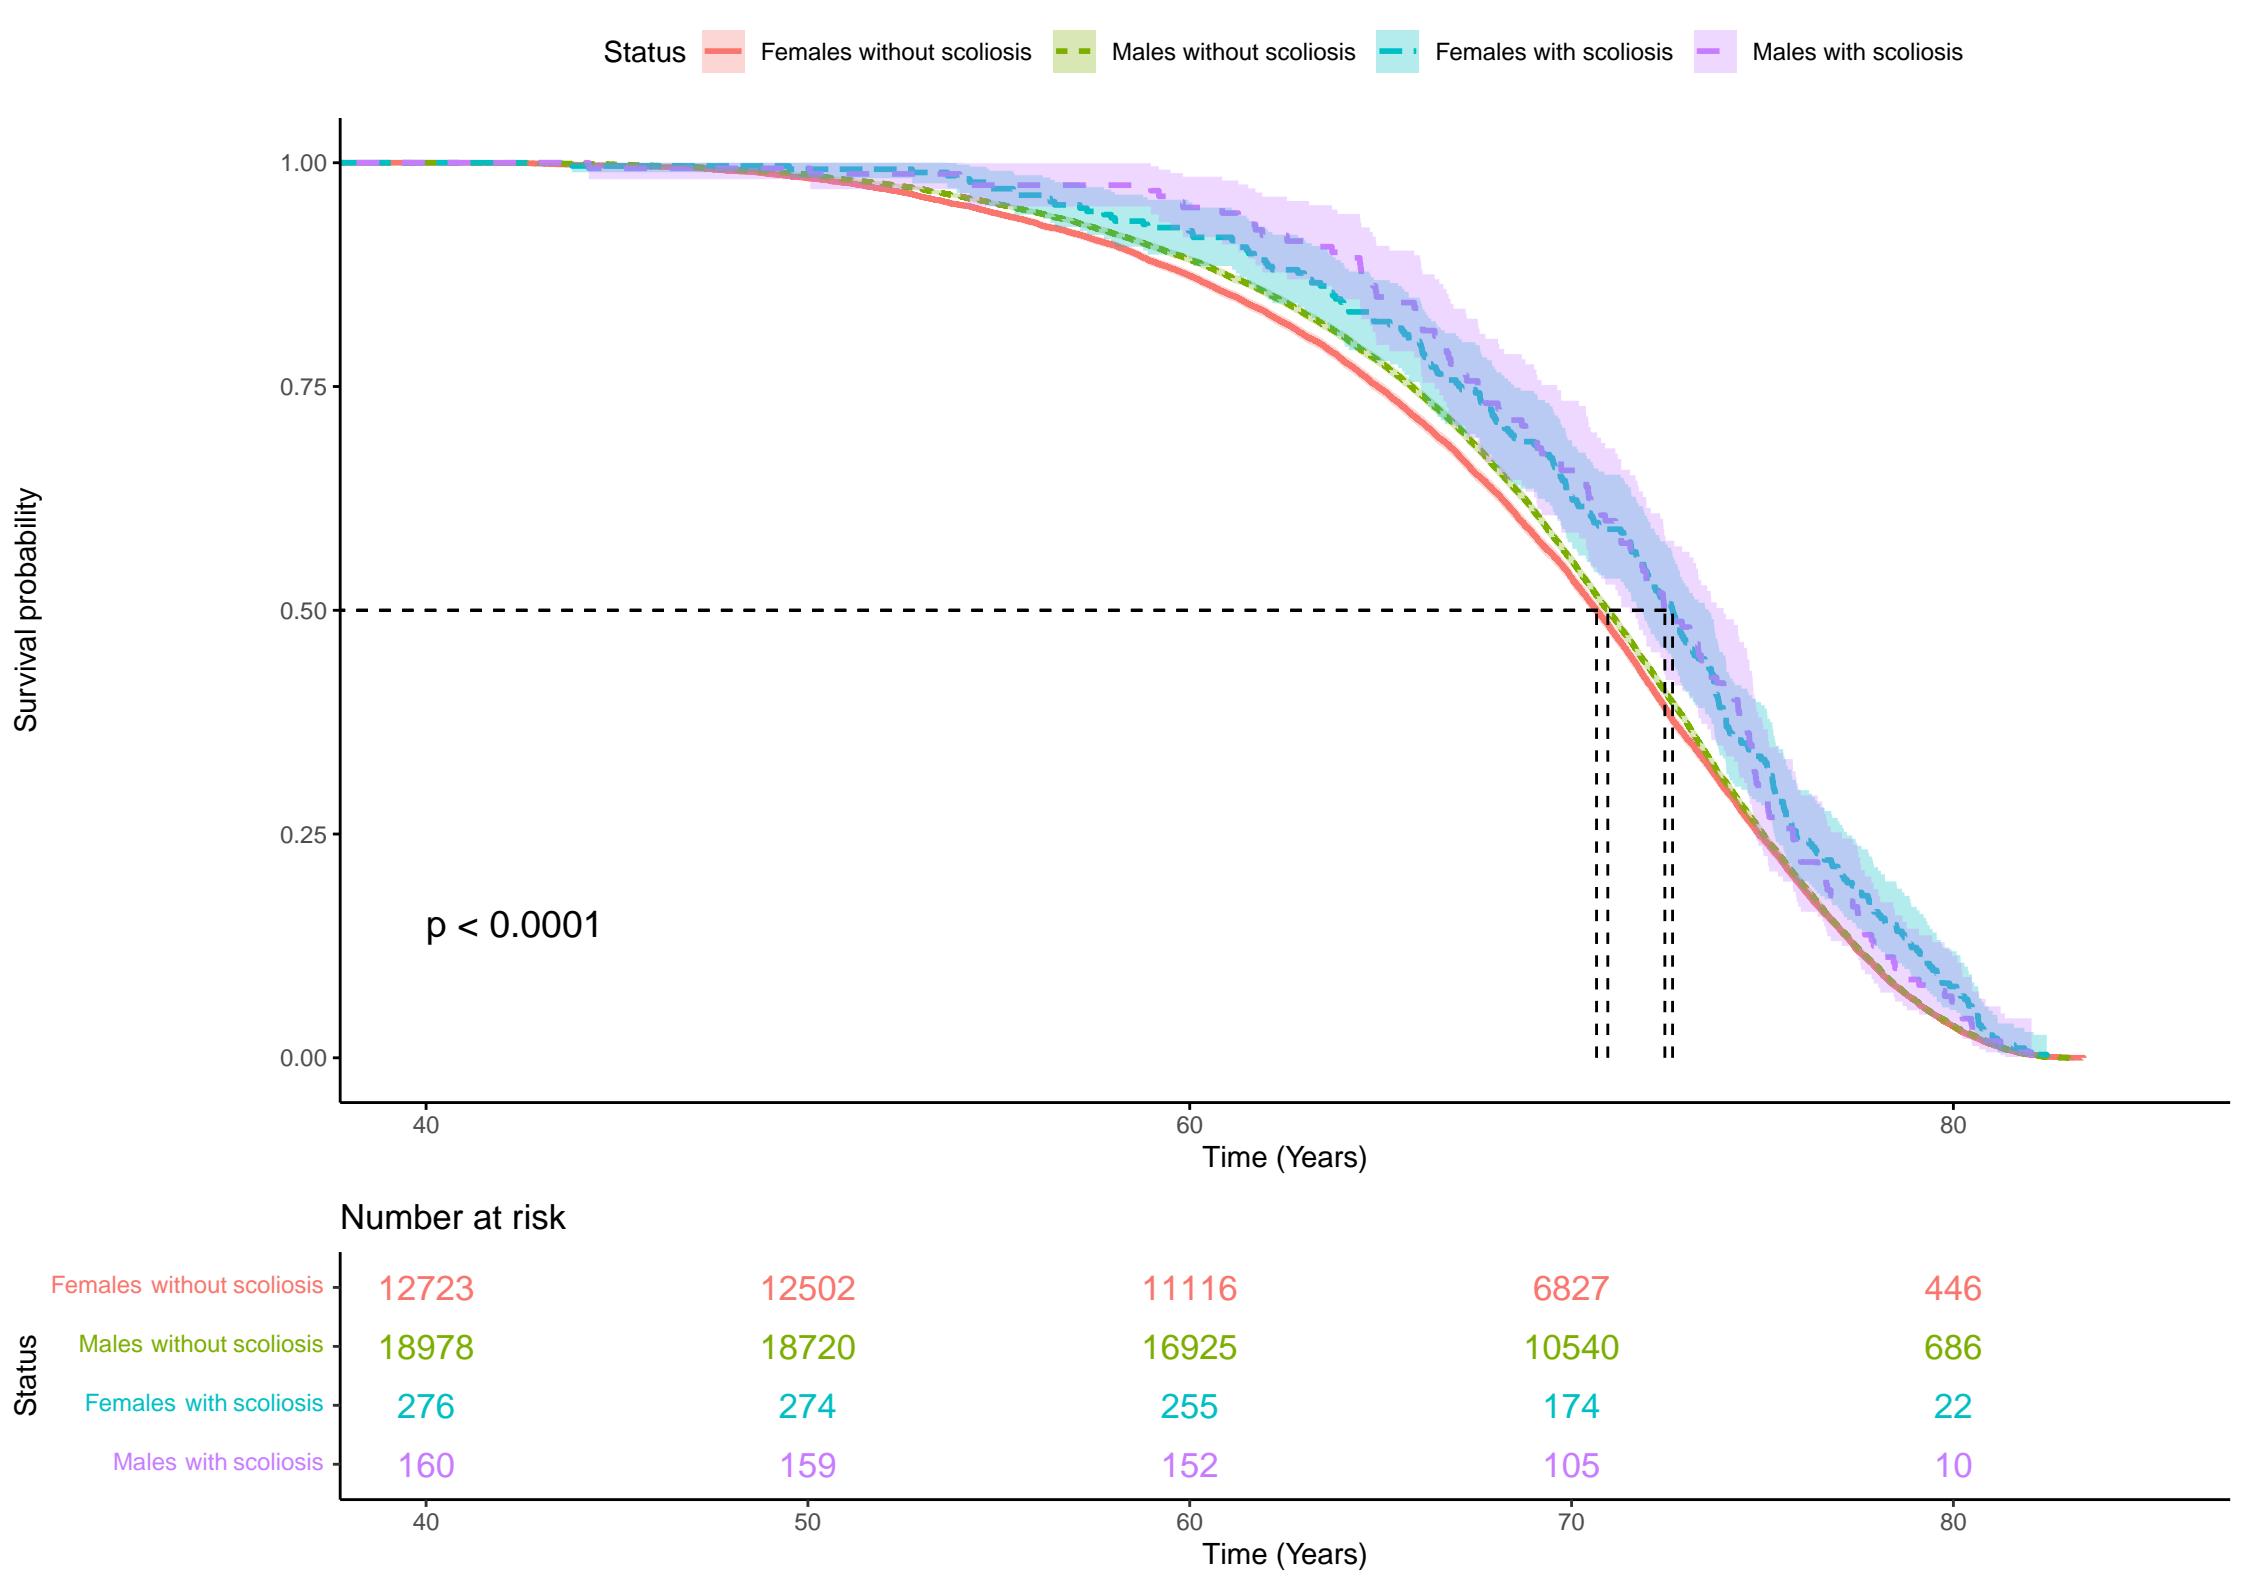

A

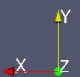

B

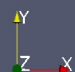

C

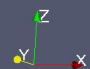

D

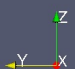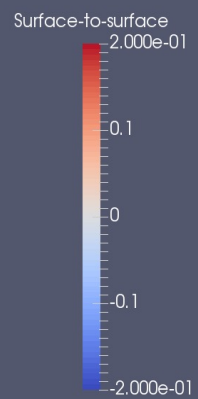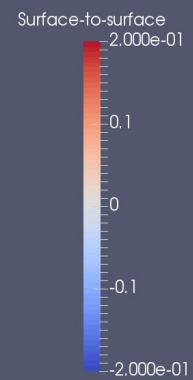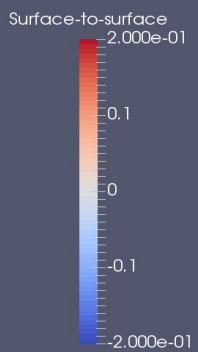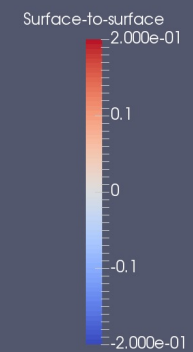

Probability freedom from events

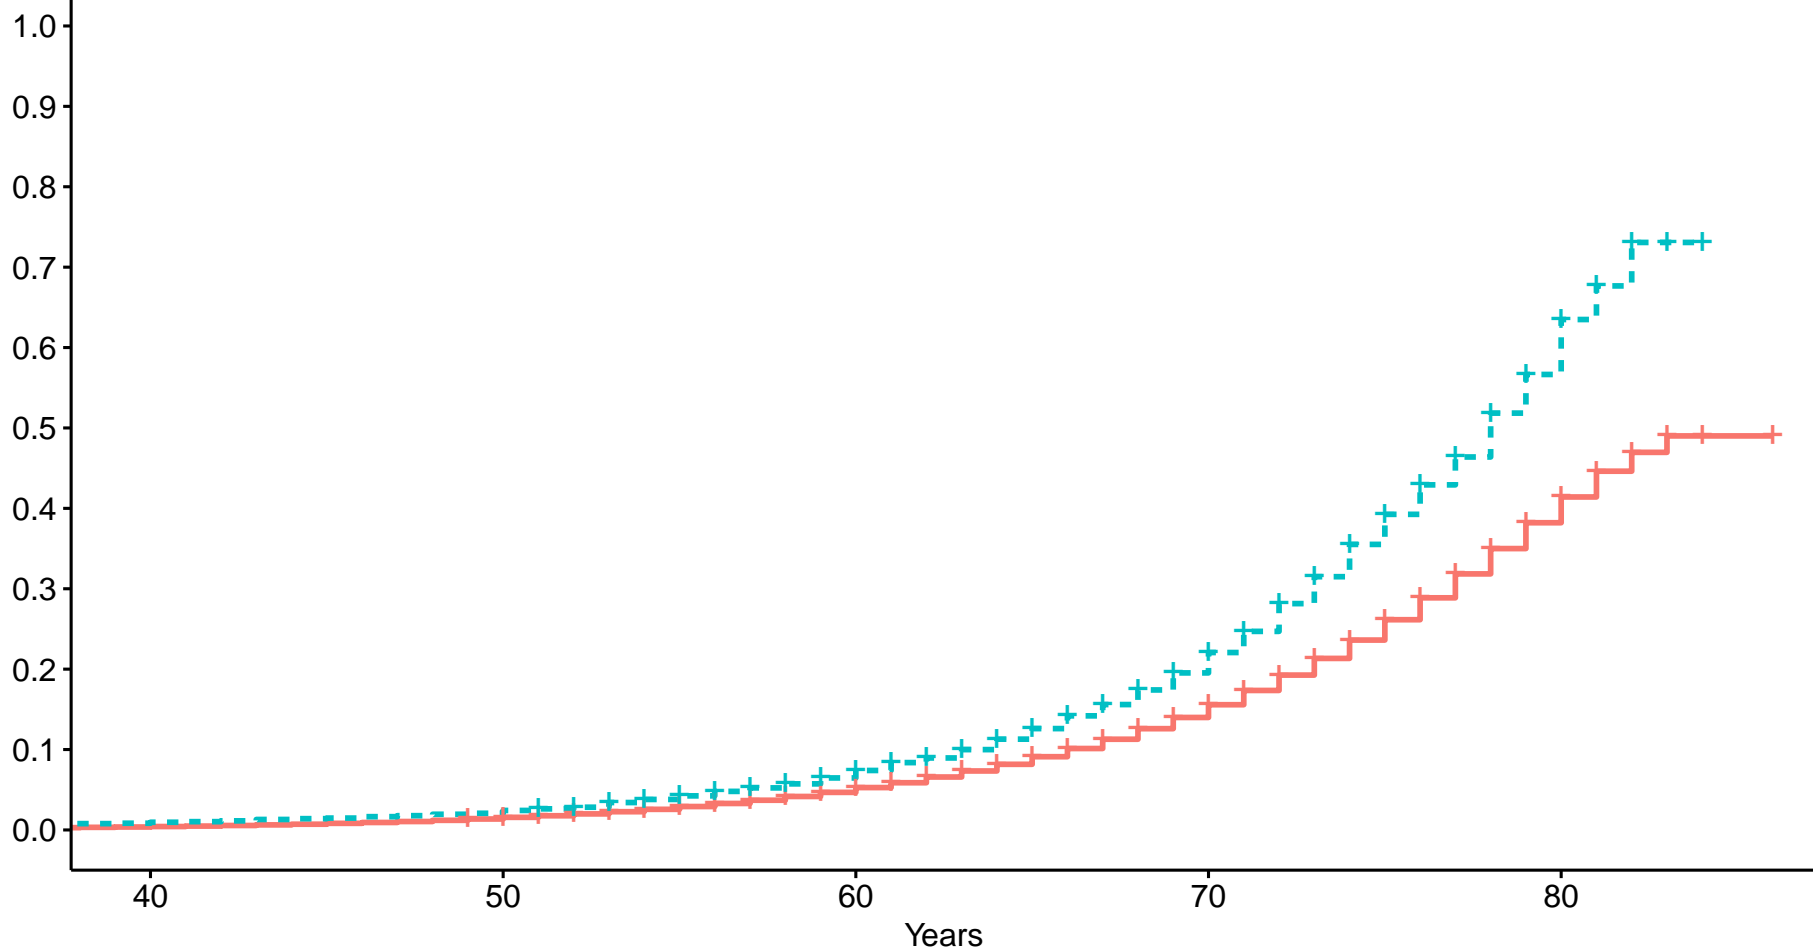

Number at risk

Status

Participants without scoliosis

496408 491495 391400 223111 24212

Participants with scoliosis

4060 4010 3465 2317 333

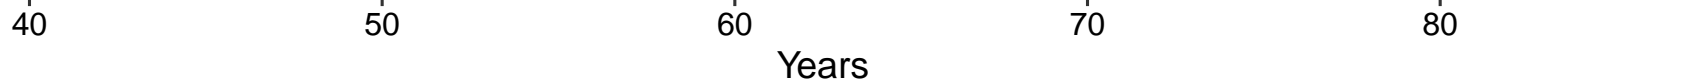

Status + Participants without scoliosis + Participants with scoliosis

Probability freedom from events

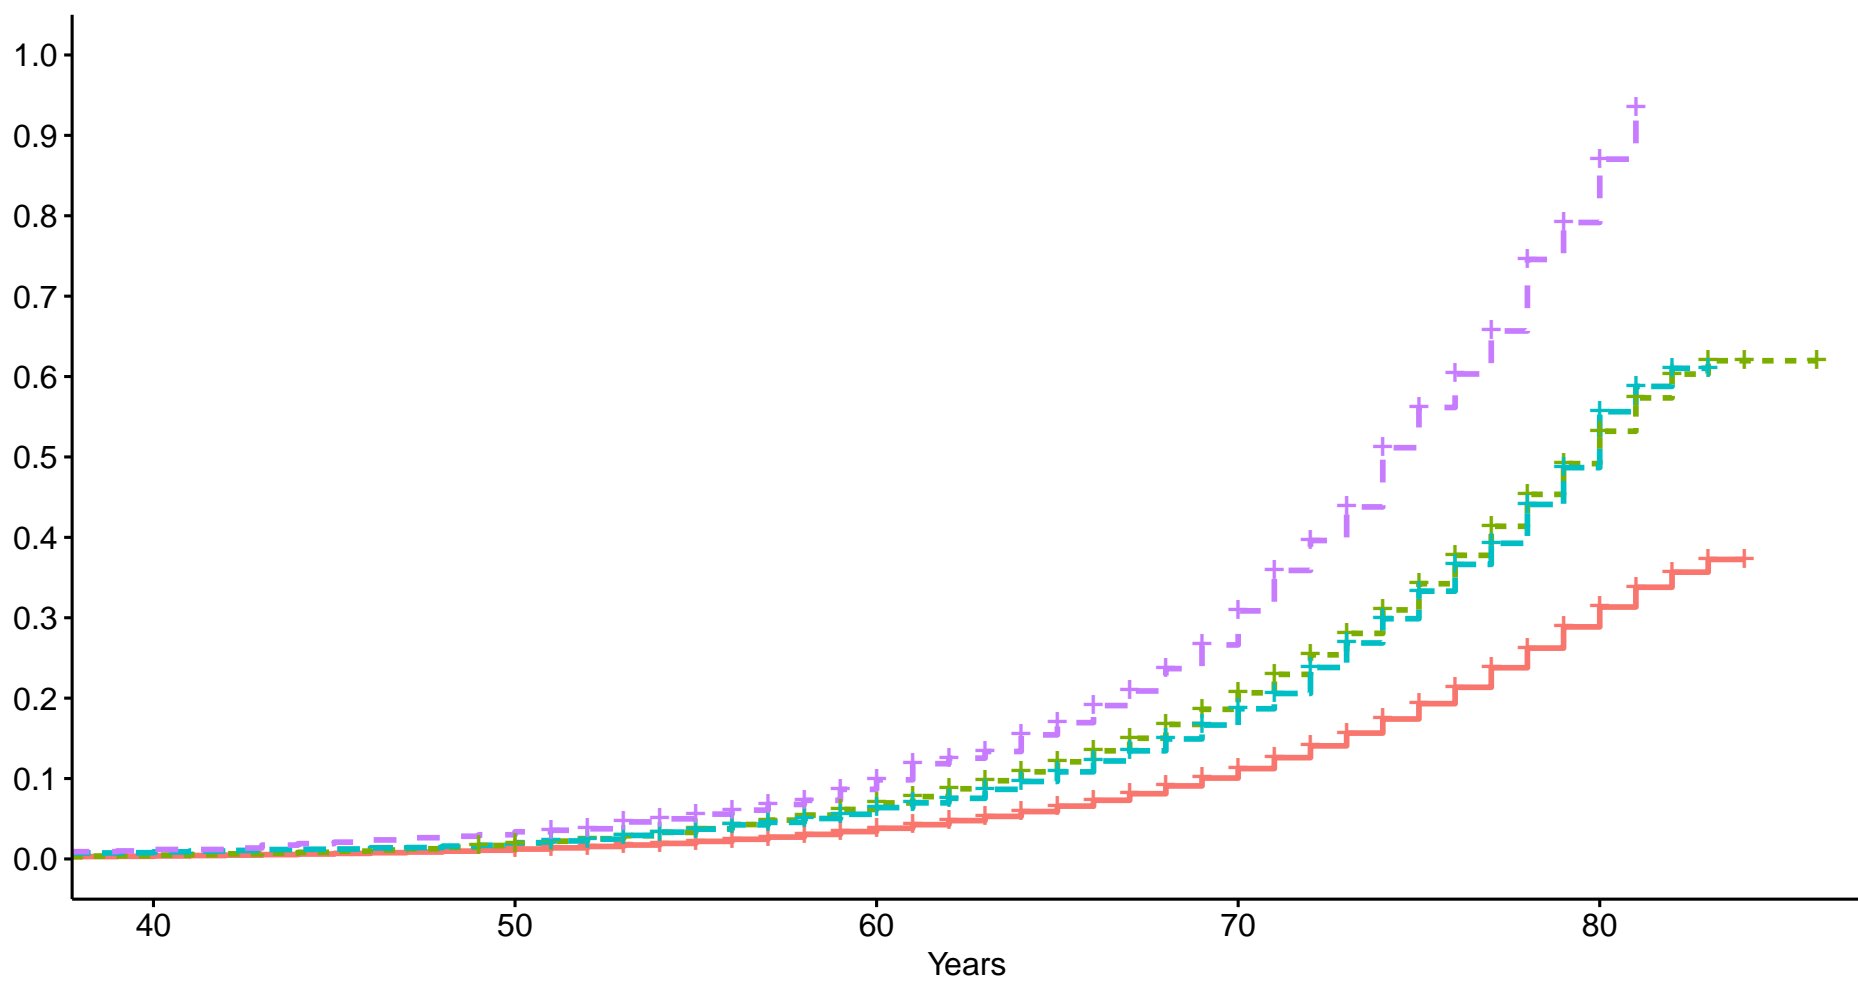

Number at risk

| Status | Females without scoliosis | 261001 | 259023 | 208016 | 119022 | 12880 |
|--------|---------------------------|--------|--------|--------|--------|-------|
|        | Males without scoliosis   | 221368 | 218578 | 172305 | 97942  | 10537 |
|        | Females with scoliosis    | 2823   | 2797   | 2422   | 1644   | 253   |
|        | Males with scoliosis      | 1102   | 1080   | 933    | 603    | 66    |
|        |                           | 40     | 50     | 60     | 70     | 80    |
|        |                           | Years  |        |        |        |       |

Status + Females without scoliosis + Males without scoliosis + Females with scoliosis + Males with scoliosis
